# Supplementary material for: Exploring healthcare providers’ perspectives of the paediatric discharge process in Uganda: a qualitative exploratory study
Source: PubMed Central journal article supplement — BMJ Open. 2019 Sep 6;9(9):e029526. doi: 10.1136/bmjopen-2019-029526 (PMC6731949; doi:10.1136/bmjopen-2019-029526), 2019-09-06
Supplement: bmjopen-2019-029526supp001.pdf [file bmjopen-2019-029526supp001.pdf]

### Nurse Focus Groups

Interview Date:

Participant Code:

#### Participant demographics:

Age group: *Please indicate sex below your age range*

| Age group | 18-25 | 26-33 | 34-41 | 42-49 | ≥ 50 |
|-----------|-------|-------|-------|-------|------|
| Sex: M/F  |       |       |       |       |      |

Education attainment: *Please indicate work history below your profession category*

| Profession/discipline                        | Certificate | Diploma | Undergraduate | Masters | Others |
|----------------------------------------------|-------------|---------|---------------|---------|--------|
| Total years in practice                      |             |         |               |         |        |
| Duration of practice in the current hospital |             |         |               |         |        |

#### Discharge process focus group guide

- 1) How do you begin your day in the hospital ward?
  - a) Priority list, handover reports, chart review, review of discharges, and patient follow-up.
- 2) Walk me through the actual process of discharging a child treated for infections from your ward? (Pay attention to when the discharge process is initiated and by whom, planning discharge, teams involved, communication, actual discharge, and follow-up)
  - a) Can you describe to me a little more about the things (special/priorities) that you pay attention to, when effecting discharge?
  - b) Can you explain to me the factors that influence these considerations?
  - c) Are there any follow-up strategies for children discharged? If any, how its done, how often, and by who?
- 3) How long does the discharge process for a child treated for infections take?
  - a) Is the time uniform for every child? Clarify to us what determines the variation?
- 4) Can you describe the roles you assume/play during discharge?
  - a) Explain your role in assessment for readiness of the child for discharge? Describe what happens if you or the mother/caregiver doesn't think the child is well enough to go home? If the doctor says "go discharge that child", can you choose to wait another day due to your judgement? If possible can you give me a scenario?
- 5) Why do you think discharge planning is important? If any,
- 6) Describe to us the challenges you encounter when implementing discharges?
  - a) How have these challenges affected the discharge process?
  - b) Explain to us what you think can be done to improve this?
- 7) Describe the best way to organize a discharge team within this hospital?
- 8) In your opinion, describe the challenges you think about, if your hospital were to introduce a new discharge protocol? Explain what makes it easier for you when there is a new protocol?
- 9) If you were in charge, how would you develop a discharge plan for paediatric inpatients in this hospital?

**Physician/Clinical Officer Focus Groups**

Interview Date:

Participant Code:

**Participant demographics**Age group: *Please indicate sex below your age range*

| Age group | 18-25 | 26-33 | 34-41 | 42-49 | ≥50 |
|-----------|-------|-------|-------|-------|-----|
| Sex M/F   |       |       |       |       |     |

Education attainment: *Please indicate work history below your profession category*

| Profession/discipline                                 | Intern | MBChB | MMED | MSc/MPH | PhD |
|-------------------------------------------------------|--------|-------|------|---------|-----|
| Total years in practice                               |        |       |      |         |     |
| Duration (months of practice in the current hospital) |        |       |      |         |     |

**Focus group discussion guide**

- 1) How do you begin your day in the hospital ward?
  - a) Priority list, handover reports, chart review, review of discharges, and patient follow-up.
- 2) Describe to us what processes you consider when discharging a child treated for sepsis? (Pay attention to when the discharge process is initiated and by whom? Planning discharge, teams involved, communication, discharge, and follow-up)
  - a) When does the discharge process begin?
  - b) Explain the priorities you consider when thinking of discharge a child treated for sepsis?
  - c) Follow-up strategies? How it's done, how often, and by who?
- 3) Describe to us the challenges that you face when considering discharge?
  - a) How do you think these challenges affected the children you discharge from the hospital?
  - b) Describe what you think can be done to improve this process?
- 4) Can you describe what roles you assume/play during the discharge process?
  - a) Can you describe to me a little more about how your current roles/activities in the process of discharge have been helpful to your patients?
  - b) Is the decision to discharge a child, solely made by you-the Doctor? Describe what happens if a member of the team on the ward or the mother/caregiver doesn't think the child is well enough to go home?
  - c) Can you explain to us what you think was not right?
  - d) Describe to us the changes you would like to see in the current discharge process?
- 5) Describe to us the best way to organize a discharge team at this hospital?
- 6) How do you see a discharge team function in the hospital setting?
- 7) In your opinion, explain the challenges or facilitators you think about, if your hospital were to introduce a new paediatric discharge protocol?
- 8) If you were in charge, how would you develop a discharge plan for paediatric inpatients in this hospital?

### Hospital Administrator In-depth Interviews

Interview Date:

Participant Code:

#### Participant demographics

Age group: *Please indicate sex below your age range*

|           |       |       |       |       |     |
|-----------|-------|-------|-------|-------|-----|
| Age group | 18-25 | 26-33 | 34-41 | 42-49 | ≥50 |
| Sex M/F   |       |       |       |       |     |

Education attainment: *Please indicate work history below your profession category*

|                                  |               |       |      |         |     |
|----------------------------------|---------------|-------|------|---------|-----|
| <b>Profession/Discipline</b>     | Undergraduate | MBChB | MMED | MSc/MPH | PhD |
| <b>Years as administrator</b>    |               |       |      |         |     |
| <b>Years in current position</b> |               |       |      |         |     |

#### In-depth interview guide

- 1) Describe some of the existing policies/guidelines regarding discharge practices in the paediatric unit, for children treated for infections.
- 2) Explain the things regarding discharge guidelines for children treated for infections, that you would like to see being implemented and are not currently in place?
  - a) What are some of the reasons why you want to see them?
- 3) What are some of the reasons to why they are not being done? (Pay attention to human resources, financing strategy, policies)
- 4) Why do you think it is important to plan discharges for children treated for sepsis?
- 5) Describe what you think is required to implement a paediatric discharge protocol in your hospital?
- 6) Describe the current strengths of your hospital in implementing the discharge process?
- 7) Describe the changes in the current discharge practices you assume need to be made to implement a new paediatric discharge protocol?
- 8) Describe the probable challenges you foresee with implementing a new paediatric discharge protocol?
- 9) How can these challenges be addressed?
- 10) If you were in charge, how would you develop a discharge plan for paediatric inpatients in this hospital?
